# Supplementary material
Source: PubMed Central journal article supplement (PMC8315653)
Supplement: mmc1.pdf [file mmc1.pdf]

# Impact of COVID-19 on routine immunisation in South-East Asia and Western Pacific: disruptions and solutions

## Online appendix

**Supplementary Figure 1:** Countries that participated in the survey are shown in green. Map created with Mapchart.net.

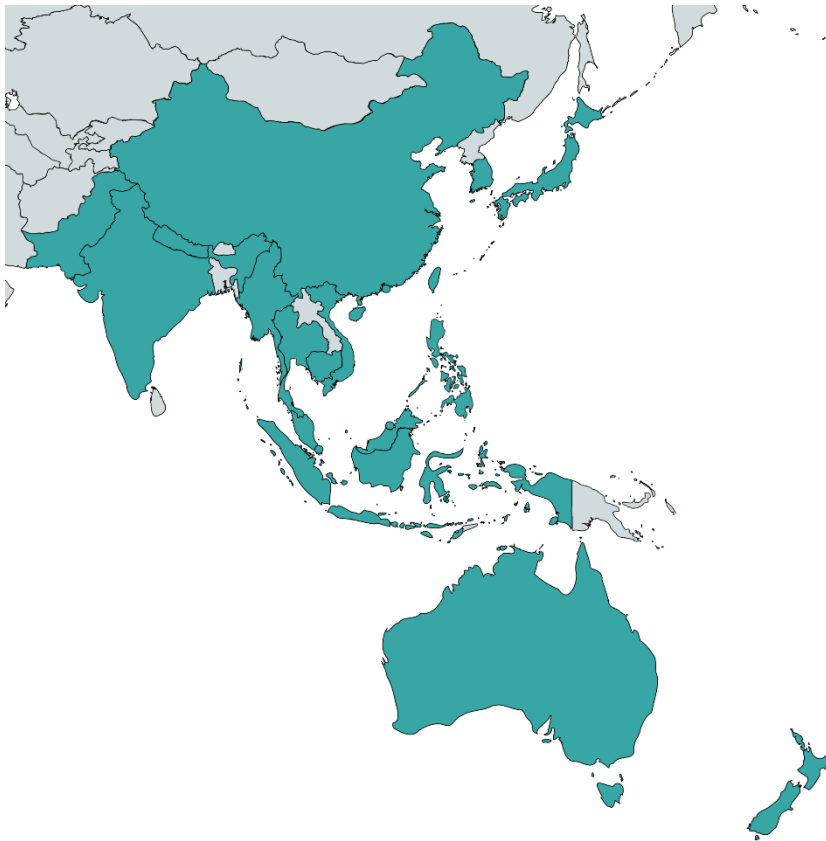

**Supplementary Figure 2:** Number of vaccines impacted in each country

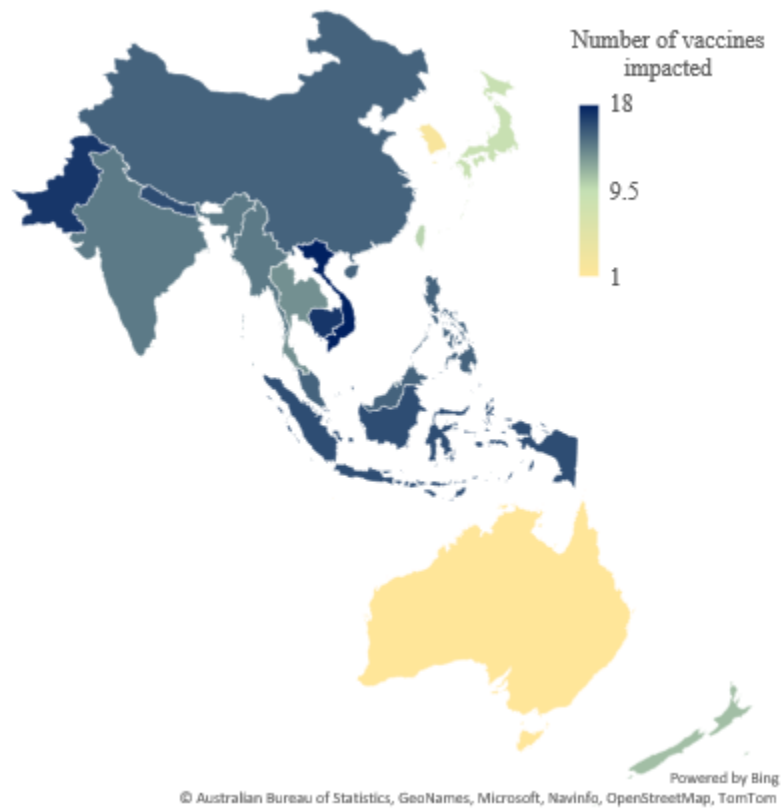

Note that South Korea appears cut off from mainland Asia, as North Korea was not included in the survey. Countries not participating in the survey are not included in the map.

**Supplementary Figure 3:** Total all-age population (millions) in countries reporting each vaccine impacted.

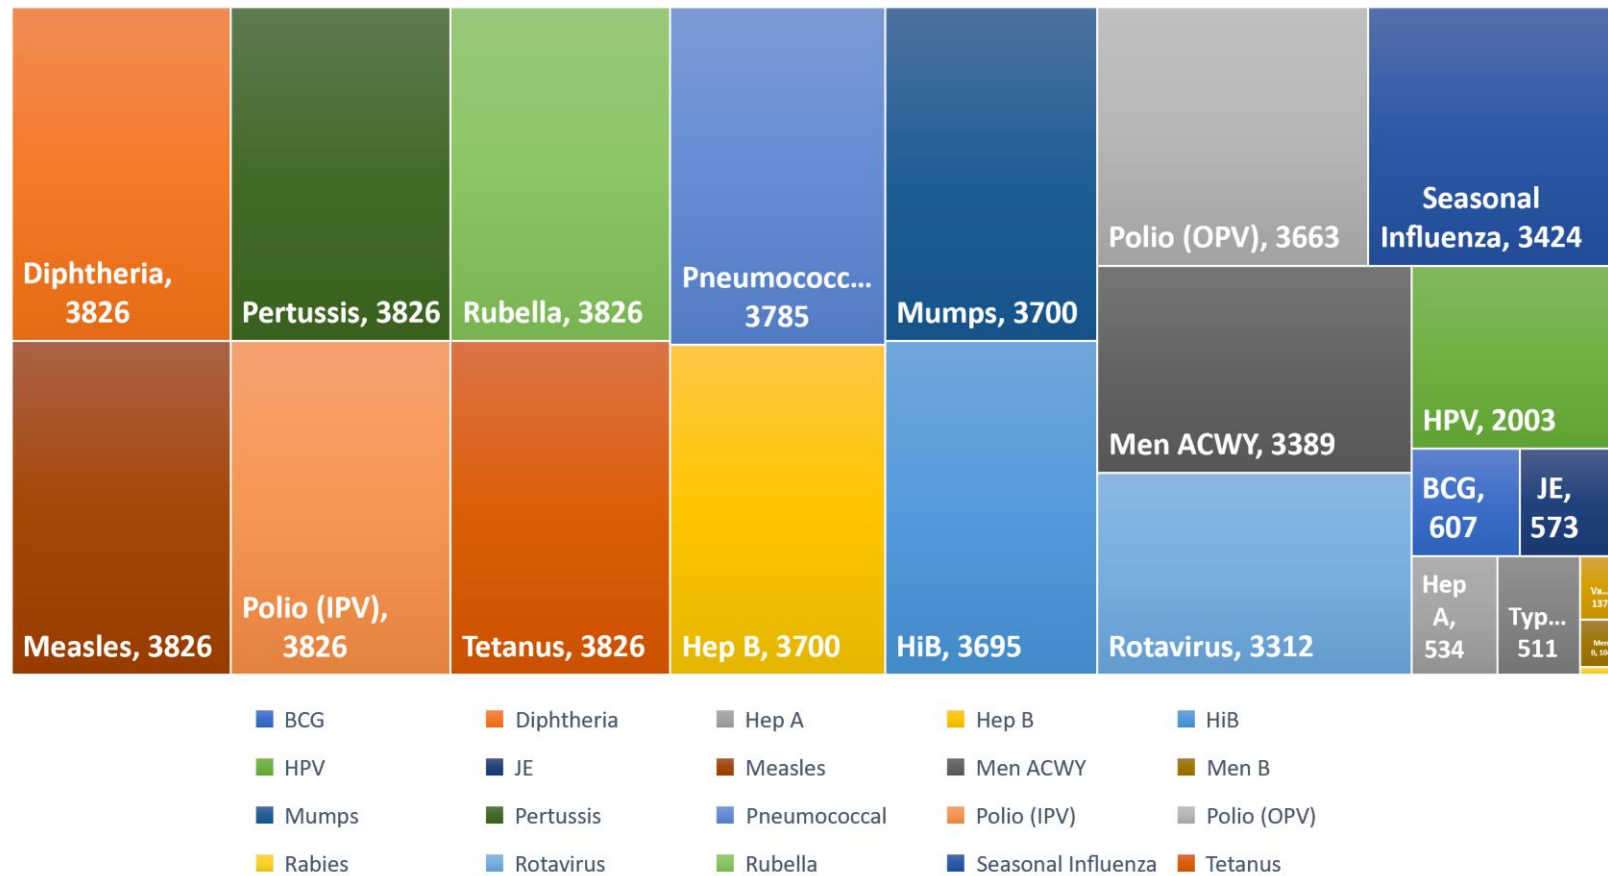

It should be noted that the represented populations do not account for ages targeted for routine vaccination, nor do they account for the age groups reported as impacted. The intention is to provide an indication of the relative scale of the population potentially at risk if declines in vaccination coverage rates were to lead to increases in transmission of vaccine preventable diseases.

**Supplementary Figure 4: Number of antigens impacted in the public and private healthcare settings. Antigens were counted individually for each age group and each country**

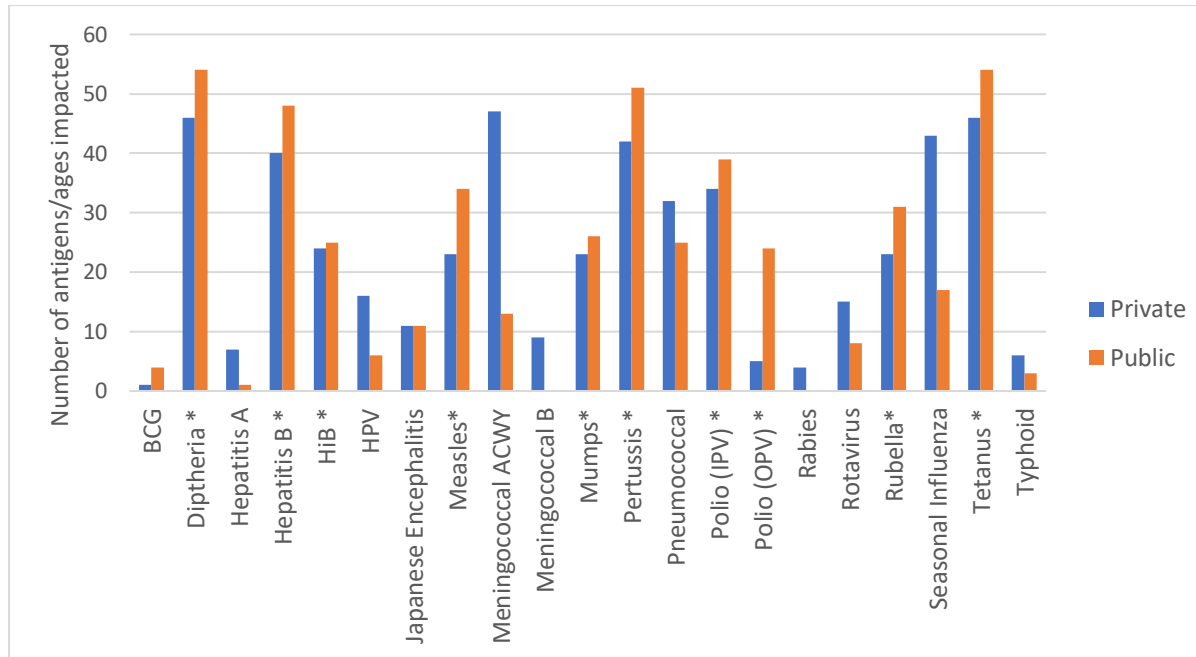

BCG, bacillus Calmette-Guérin; HiB, *Haemophilus influenzae* B; HPV, human papilloma virus; IPV, inactivated polio vaccine; OPV, oral polio vaccine





| What was the VCR during the PEAK of COVID-related disruptions? (in % terms, whole numbers, NO RANGES please), enter 'INA' if info not available. |                                   |                                             |                                      |                           | Please indicate whether this is estimated or reported | If reported, please paste links/ references to data. If estimated, please indicate (where possible) any information this was based on | Have the public/ private markets been similarly affected? | Please briefly describe any differences in disruptions in public vs private market | Were there any geographical/ regional differences in the impact on VCR? | If yes, please briefly describe how they differed (e.g. urban more impacted than rural, a particular province more impacted) | Has the VCR returned to normal as of 1st June 2020? |
|--------------------------------------------------------------------------------------------------------------------------------------------------|-----------------------------------|---------------------------------------------|--------------------------------------|---------------------------|-------------------------------------------------------|---------------------------------------------------------------------------------------------------------------------------------------|-----------------------------------------------------------|------------------------------------------------------------------------------------|-------------------------------------------------------------------------|------------------------------------------------------------------------------------------------------------------------------|-----------------------------------------------------|
| Early infancy (0 to 8weeks)                                                                                                                      | Infants and toddlers (9w to <24m) | Pre-school and school-entry age (2y to <7y) | Children and adolescents (7 to <18y) | Adults and elderly (18y+) |                                                       |                                                                                                                                       |                                                           |                                                                                    |                                                                         |                                                                                                                              |                                                     |
| Same list of antigens as in Section 2                                                                                                            |                                   |                                             |                                      |                           |                                                       |                                                                                                                                       |                                                           |                                                                                    |                                                                         |                                                                                                                              |                                                     |
|                                                                                                                                                  |                                   |                                             |                                      |                           |                                                       |                                                                                                                                       |                                                           |                                                                                    |                                                                         |                                                                                                                              |                                                     |

| Section 4: Reasons for Disruption                   |                                                                                                          |                                                            |
|-----------------------------------------------------|----------------------------------------------------------------------------------------------------------|------------------------------------------------------------|
|                                                     | Please indicate which of the below were a reason for disruption of the coverage of routine immunisation? | Please rank these reasons in order of importance/relevance |
| Supply-chain disruption                             |                                                                                                          |                                                            |
| Travel/movement restrictions by Government          |                                                                                                          |                                                            |
| Consumers' fear of infection                        |                                                                                                          |                                                            |
| Consumers' priority change                          |                                                                                                          |                                                            |
| Accessibility to healthcare system/HCPs             |                                                                                                          |                                                            |
| Affordability issues                                |                                                                                                          |                                                            |
| Consumers' lack of awareness                        |                                                                                                          |                                                            |
| Government deprioritisation of the vaccine          |                                                                                                          |                                                            |
| Lack of guidelines on catch-up/delayed immunization |                                                                                                          |                                                            |
| Others, please list:                                |                                                                                                          |                                                            |

| <b>Section 5: Measures to reduce vaccination disruption</b>                                                                                                                                                                                                                                                                                                                                                                        |                                                   |                                                       |                                                                                                |
|------------------------------------------------------------------------------------------------------------------------------------------------------------------------------------------------------------------------------------------------------------------------------------------------------------------------------------------------------------------------------------------------------------------------------------|---------------------------------------------------|-------------------------------------------------------|------------------------------------------------------------------------------------------------|
| <b>Please share examples of measures undertaken by different stakeholders to minimise vaccination disruption</b>                                                                                                                                                                                                                                                                                                                   | <b>Has this measure been implemented already?</b> | <b>Has the impact of this measure been evaluated?</b> | <b>Where impact has been evaluated, please share the summarised results of the evaluation.</b> |
| Please share examples of public health measures undertaken by the Government or public health bodies to minimize vaccination disruption (e.g. policy, programmes). Please focus on examples that were successful, and provide a summary of the measure taken, and indicate any key characteristics of the measure that were important to its success.                                                                              |                                                   |                                                       |                                                                                                |
| Please share examples of private health sector initiatives to minimize vaccination disruption (e.g. patient journey innovation such as vaccination drive throughs in Philippines). Please focus on examples that were successful, and provide a summary of the measure taken, and indicate any key characteristics of the measure that were important to its success.                                                              |                                                   |                                                       |                                                                                                |
| Please share examples of measures undertaken by the Sanofi Pasteur team (or other vaccine companies) to minimize vaccination disruption (e.g. Bilateral ZOOM meeting between CH & PH; Medical 360 by DE; Vaccines Confidence Initiative by ES). Please focus on examples that were successful, and provide a summary of the measure taken, and indicate any key characteristics of the measure that were important to its success. |                                                   |                                                       |                                                                                                |
| If you have any examples of measures taken that were unsuccessful in minimising disruption, please provide a short description, and any key characteristics that may have contributed to the lack of success.                                                                                                                                                                                                                      |                                                   |                                                       |                                                                                                |

| <b>Section 6: Other information of relevance</b>                                                             |  |
|--------------------------------------------------------------------------------------------------------------|--|
| Please feel free to share any other information of importance/relevance to the subject of this questionnaire |  |



**Supplementary Table 2:** Modified Ng and de Colombani's framework<sup>1</sup> for assessing the fitness to purpose of proposed solutions

| Category          | Criterion                                                     | Question                                                                                                                                   | Yes | No |
|-------------------|---------------------------------------------------------------|--------------------------------------------------------------------------------------------------------------------------------------------|-----|----|
| <b>Context</b>    | <b>Relevant</b>                                               | Is this initiative relevant to the COVID-related situation? (Based on top three reasons for disruption)                                    | 1   | 0  |
|                   |                                                               | Is this initiative relevant to the setting of the jurisdictions during COVID-related situation? (income level, geographical barriers, etc) | 1   | 0  |
| <b>Process</b>    | <b>Community participation</b>                                | Have the members of the community been involved? (Public and private side)                                                                 | 1   | 0  |
|                   |                                                               | Was the synergy with community participation considered during programme development and implementation?                                   | 1   | 0  |
|                   | <b>Righteous</b>                                              | Does it bring tangible benefits outweighing the risk of not doing it?                                                                      | 1   | 0  |
|                   |                                                               | Does it demonstrate respect for individual autonomy and privacy?                                                                           | 1   | 0  |
|                   |                                                               | Have the vulnerable groups been considered?                                                                                                | 1   | 0  |
|                   | <b>Replicable</b>                                             | Is this initiative generalisable to other settings/jurisdictions?                                                                          | 1   | 0  |
| <b>Timeliness</b> | Can the initiative be implemented within a period of 1 month? | 1                                                                                                                                          | 0   |    |
| <b>Outcomes</b>   | <b>Effective</b>                                              | Can the direct impact be measured for this initiative?                                                                                     | 1   | 0  |
|                   |                                                               | Did it achieve desirable outcomes?                                                                                                         | 1   | 0  |
|                   | <b>Efficient</b>                                              | Did the initiative use locally accessible resources?                                                                                       | 1   | 0  |
|                   |                                                               | Does this initiative use currently existing resources?                                                                                     | 1   | 0  |
|                   | <b>Sustainable</b>                                            | Does it have the potential to continue through local ownership after pandemic?                                                             | 1   | 0  |
|                   |                                                               | Is it financially viable in the long term (run on its own)?                                                                                | 1   | 0  |

<sup>1</sup> Ng E, de Colombani P. Framework for Selecting Best Practices in Public Health: A Systematic Literature Review. *J Public Health Res* 2015;4(3):577

**Supplementary Table 3:** Vaccines in use in each country.

| Country     | Population (thousands) | Vaccines in routine use                                                                                                                                                                                                        |
|-------------|------------------------|--------------------------------------------------------------------------------------------------------------------------------------------------------------------------------------------------------------------------------|
| Australia   | 25 398                 | Diphtheria, Hepatitis B, HiB, HPV, Measles, Meningococcal ACWY, Meningococcal B, Mumps, Pertussis, Pneumococcal, Polio (IPV), Rotavirus, Rubella, Seasonal Influenza, Tetanus                                                  |
| Brunei      | 445                    | BCG, Diphtheria, Hepatitis B, HiB, HPV, Measles, Meningococcal ACWY, Mumps, Pertussis, Pneumococcal, Polio (IPV), Rotavirus, Rubella, Seasonal Influenza, Tetanus                                                              |
| Cambodia    | 16 716                 | BCG, Diphtheria, Hepatitis B, HiB, HPV, Measles, Meningococcal ACWY, Mumps, Pertussis, Pneumococcal, Polio (IPV), Polio (OPV), Rotavirus, Rubella, Seasonal Influenza, Tetanus, Japanese Encephalitis, Rabies                  |
| China       | 1 425 200              | BCG, Diphtheria, Hepatitis B, HiB, HPV, Measles, Meningococcal ACWY, Mumps, Pertussis, Pneumococcal, Polio (IPV), Polio (OPV), Rotavirus, Rubella, Seasonal Influenza, Tetanus                                                 |
| Hong Kong   | 7 548                  | BCG, Diphtheria, Hepatitis B, HiB, HPV, Measles, Meningococcal ACWY, Meningococcal B, Mumps, Pertussis, Pneumococcal, Polio (IPV), Rotavirus, Rubella, Seasonal Influenza, Tetanus                                             |
| India       | 1 383 198              | BCG, Diphtheria, Hepatitis B, HiB, HPV, Measles, Meningococcal ACWY, Mumps, Pertussis, Pneumococcal, Polio (IPV), Polio (OPV), Rotavirus, Rubella, Seasonal Influenza, Tetanus                                                 |
| Indonesia   | 272 223                | BCG, Diphtheria, Hepatitis B, HiB, HPV, Measles, Mumps, Pertussis, Pneumococcal, Polio (IPV), Polio (OPV), Rubella, Seasonal Influenza, Tetanus, Hepatitis A, Typhoid, Japanese Encephalitis                                   |
| Japan       | 126 496                | BCG, Diphtheria, Hepatitis B, HiB, HPV, Measles, Meningococcal ACWY, Mumps, Pertussis, Pneumococcal, Polio (IPV), Rotavirus, Rubella, Seasonal Influenza, Tetanus, Japanese Encephalitis, Varicella                            |
| Malaysia    | 32 869                 | BCG, Diphtheria, Hepatitis B, HiB, HPV, Measles, Meningococcal ACWY, Mumps, Pertussis, Pneumococcal, Polio (IPV), Polio (OPV), Rotavirus, Rubella, Seasonal Influenza, Tetanus                                                 |
| Myanmar     | 54 808                 | BCG, Diphtheria, Hepatitis B, HiB, HPV, Measles, Meningococcal ACWY, Mumps, Pertussis, Pneumococcal, Polio (IPV), Polio (OPV), Rotavirus, Rubella, Seasonal Influenza, Tetanus                                                 |
| Nepal       | 30 260                 | BCG, Diphtheria, Hepatitis B, HiB, Measles, Meningococcal ACWY, Mumps, Pertussis, Pneumococcal, Polio (IPV), Polio (OPV), Rubella, Seasonal Influenza, Tetanus, Hepatitis A, Typhoid                                           |
| New Zealand | 4 834                  | Diphtheria, Hepatitis B, HPV, Measles, Mumps, Pertussis, Pneumococcal, Polio (IPV), Rotavirus, Rubella, Seasonal Influenza, Tetanus, Varicella                                                                                 |
| Pakistan    | 208 362                | BCG, Diphtheria, Hepatitis B, HiB, HPV, Measles, Meningococcal ACWY, Mumps, Pertussis, Pneumococcal, Polio (IPV), Polio (OPV), Rotavirus, Rubella, Seasonal Influenza, Tetanus, Hepatitis A, Typhoid                           |
| Philippines | 109 703                | BCG, Diphtheria, Hepatitis B, HiB, HPV, Measles, Meningococcal ACWY, Mumps, Pertussis, Pneumococcal, Polio (IPV), Polio (OPV), Rotavirus, Rubella, Seasonal Influenza, Tetanus                                                 |
| Singapore   | 5 935                  | BCG, Diphtheria, Hepatitis B, HiB, HPV, Measles, Meningococcal ACWY, Meningococcal B, Mumps, Pertussis, Pneumococcal, Polio (IPV), Rotavirus, Rubella, Seasonal Influenza, Tetanus, Varicella                                  |
| South Korea | 51 507                 | BCG, Diphtheria, Hepatitis B, HiB, HPV, Measles, Meningococcal ACWY, Mumps, Pertussis, Pneumococcal, Polio (IPV), Polio (OPV), Rotavirus, Rubella, Seasonal Influenza, Tetanus                                                 |
| Taiwan      | 23 818                 | BCG, Diphtheria, Hepatitis B, HiB, HPV, Measles, Mumps, Pertussis, Pneumococcal, Polio (IPV), Rotavirus, Rubella, Seasonal Influenza, Tetanus, Hepatitis A, Japanese Encephalitis                                              |
| Thailand    | 69 411                 | BCG, Diphtheria, Hepatitis B, HiB, HPV, Measles, Meningococcal ACWY, Mumps, Pertussis, Pneumococcal, Polio (IPV), Polio (OPV), Rubella, Seasonal Influenza, Tetanus, Japanese Encephalitis                                     |
| Vietnam     | 98 360                 | BCG, Diphtheria, Hepatitis B, HiB, HPV, Measles, Meningococcal ACWY, Meningococcal B, Mumps, Pertussis, Pneumococcal, Polio (IPV), Polio (OPV), Rotavirus, Rubella, Seasonal Influenza, Tetanus, Japanese Encephalitis, Rabies |
